# Supplementary material for: Comparison of different clinical risk scores to predict long-term survival and neurological outcome in adults after cardiac arrest: results from a prospective cohort study
Source: PubMed Central journal article supplement (PMC9385915; doi:10.1186/s13613-022-01048-y), 2022-08-17
Supplement: 13613_2022_1048_MOESM1_ESM.pdf [file 13613_2022_1048_MOESM1_ESM.pdf]

## Supplementary Material

| Supplementary Table 1 – Subgroup analysis |          |                  |                             |                  |
|-------------------------------------------|----------|------------------|-----------------------------|------------------|
| Score                                     | Subgroup | AUROC            |                             |                  |
|                                           |          | 2-year mortality | 2-year neurological outcome | 6-year mortality |
| OHCA                                      | OHCA     | 0.85 (0.81-0.89) | 0.83 (0.78-0.88)            | 0.80 (0.74-0.87) |
|                                           | IHCA     | 0.68 (0.53-0.83) | 0.74 (0.54-0.93)            | 0.69 (0.36-1.00) |
|                                           | p-value  | 0.0277           | 0.3519                      | 0.5290           |
| CAHP                                      | OHCA     | 0.89 (0.86-0.92) | 0.88 (0.84-0.92)            | 0.89 (0.83-0.94) |
|                                           | IHCA     | 0.74 (0.60-0.88) | 0.69 (0.46-0.92)            | 0.89 (0.71-1.00) |
|                                           | p-value  | 0.0353           | 0.1152                      | 0.9751           |
| APACHE II                                 | OHCA     | 0.84 (0.80-0.88) | 0.84 (0.79-0.89)            | 0.84 (0.77-0.90) |
|                                           | IHCA     | 0.76 (0.62-0.90) | 0.70 (0.41-0.98)            | 0.80 (0.48-1.00) |
|                                           | p-value  | 0.2720           | 0.3337                      | 0.8108           |
| SAPS II                                   | OHCA     | 0.82 (0.77-0.85) | 0.79 (0.74-0.84)            | 0.79 (0.73-0.86) |
|                                           | IHCA     | 0.75 (0.61-0.88) | 0.72 (0.43-1.00)            | 0.88 (0.70-1.00) |
|                                           | p-value  | 0.3553           | 0.6355                      | 0.4053           |

Score performance in the subgroups of OHCA patients and IHCA patients. Statistical comparison between AUROC was conducted according to DeLong et al. (1988), p-values are from the X<sup>2</sup>-test. **APACHE II** Acute Physiology and Chronic Health Evaluation Score II; **AUROC** Area under the receiver operating characteristics curve; **CAHP** Cardiac Arrest Hospital Prognosis Score; **IHCA** In-Hospital Cardiac Arrest; **OHCA** Out-of-Hospital Cardiac Arrest Score; **SAPS II** Simplified Acute Physiology Score II.

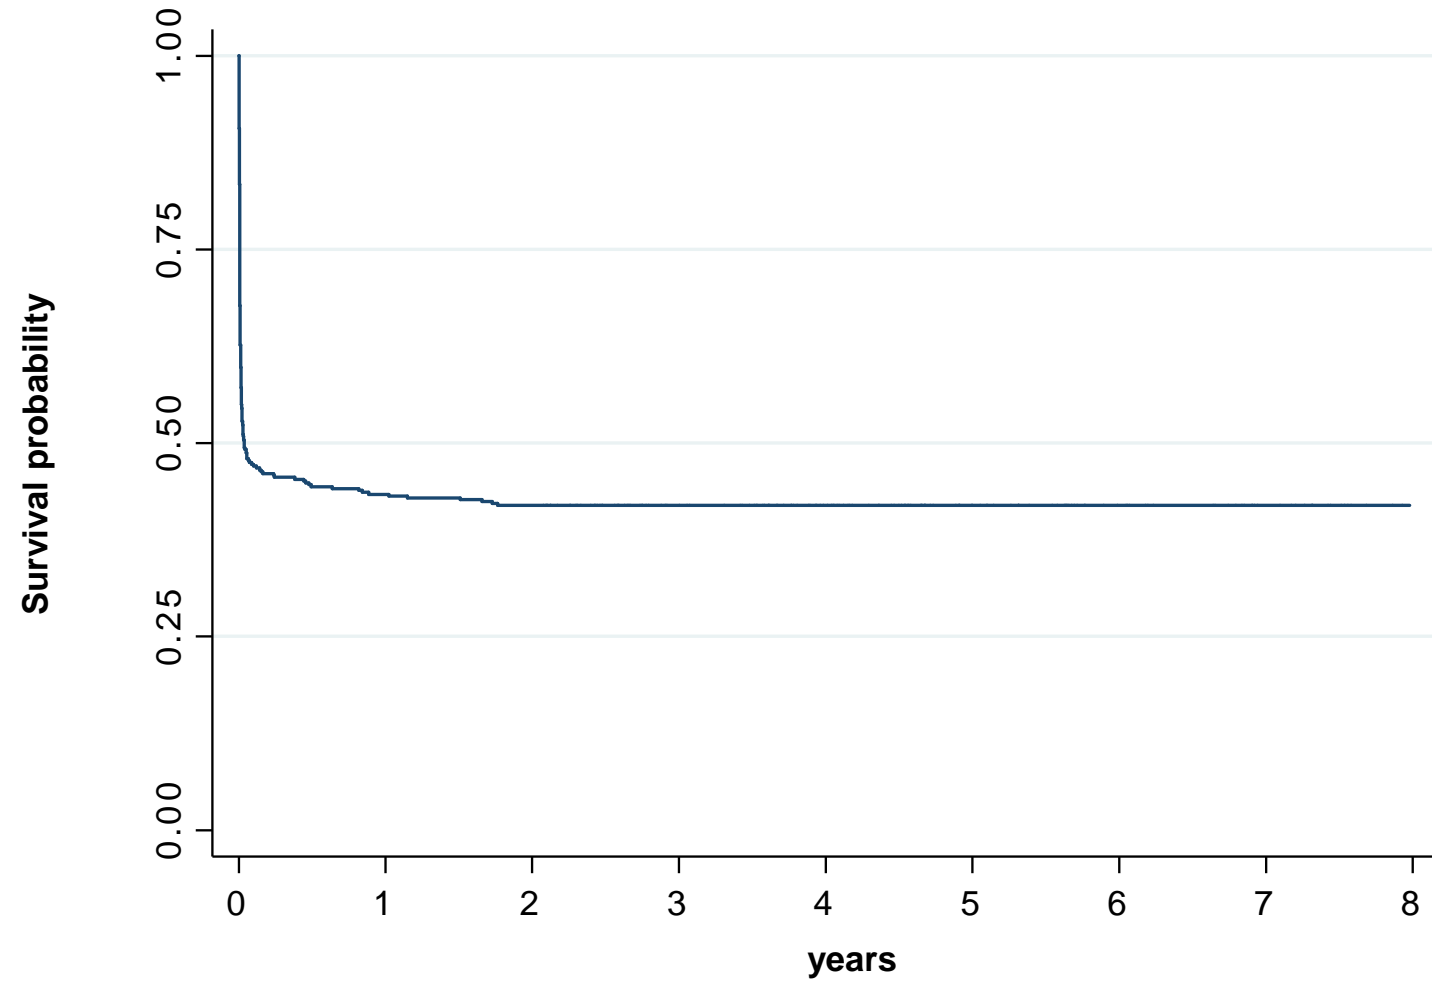

Number at risk      415      180      174      139      110      75      51      33      16

**Supplementary Figure 1.** Kaplan Meier survival estimate for the entire cohort. Number at risk for the individual time points are reported.

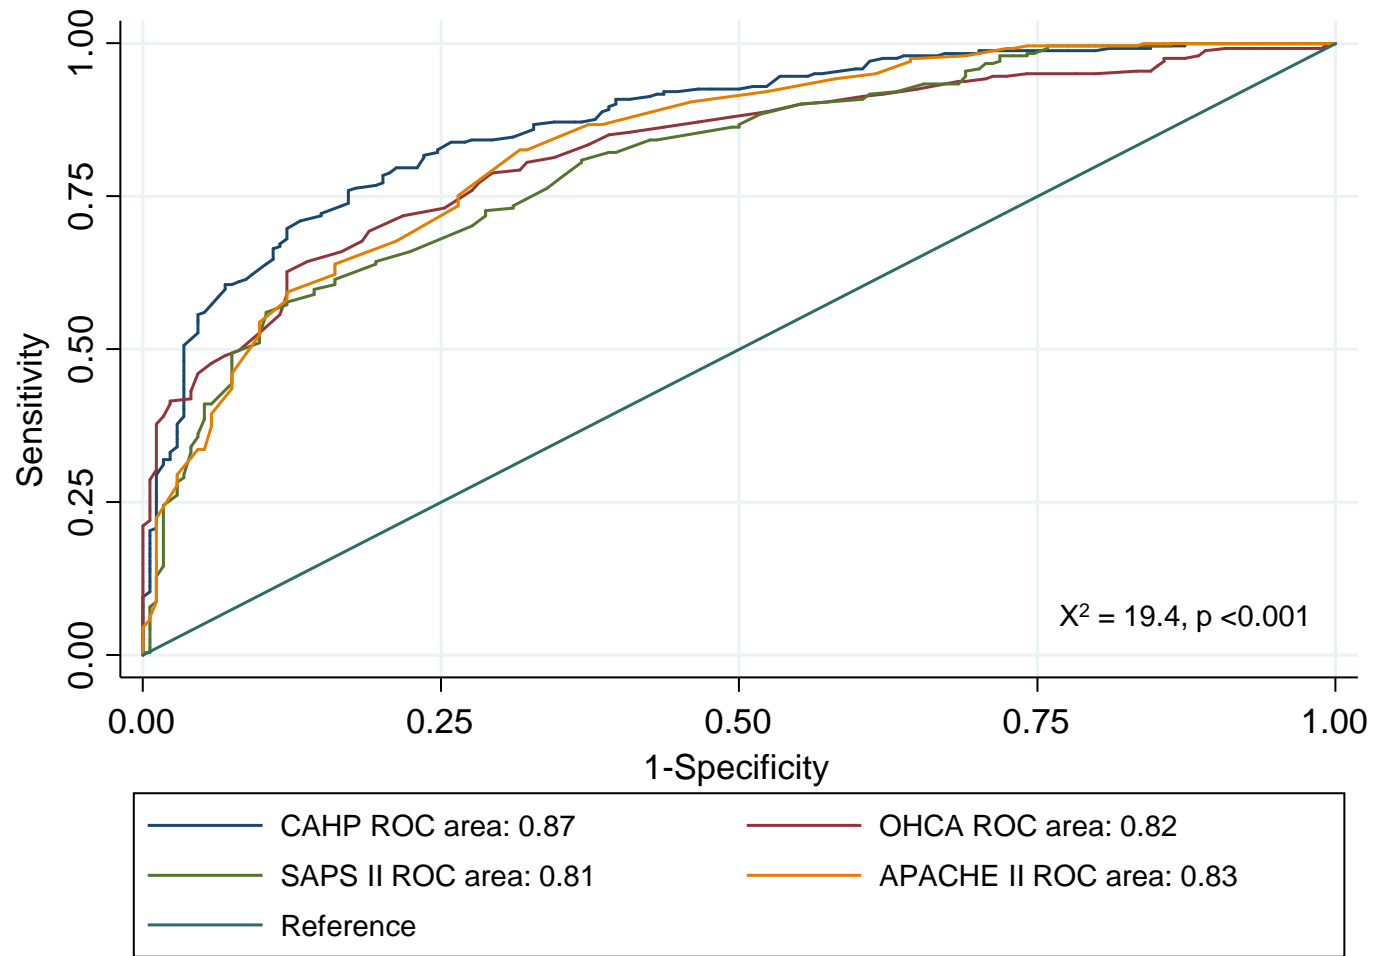

**Supplementary Figure 2.** Comparison of ROC curves for the primary outcome 2-year mortality.

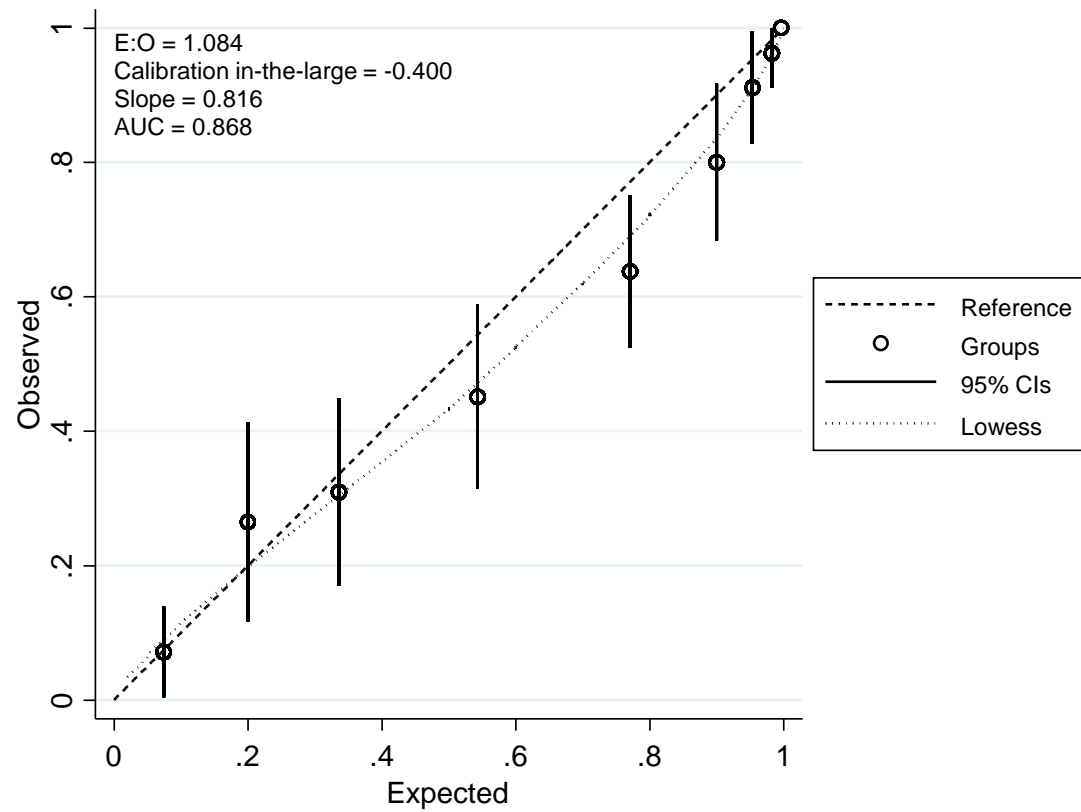

**Supplementary Figure 3.** Calibration plot depicting observed vs. expected numbers of primary outcome (2-year mortality) per decile of risk as predicted by the CAHP score.

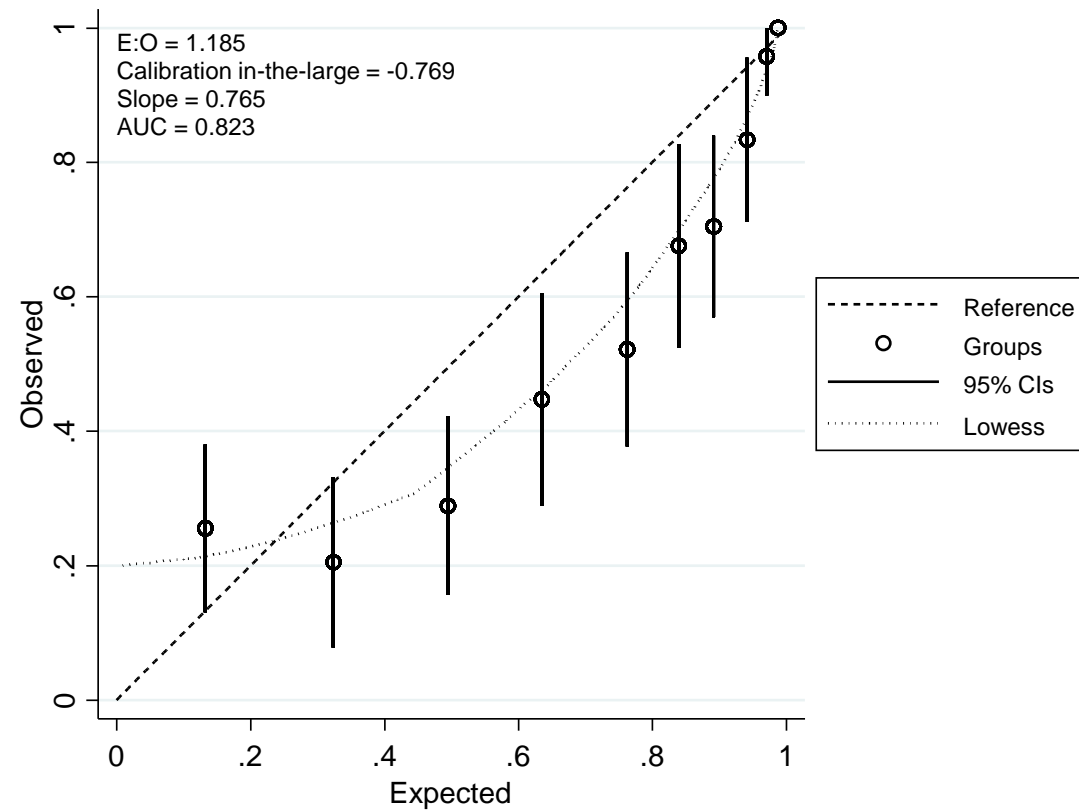

**Supplementary Figure 4.** Calibration plot depicting observed vs. expected numbers of primary outcome (2-year mortality) per decile of risk as predicted by the OHCA score.

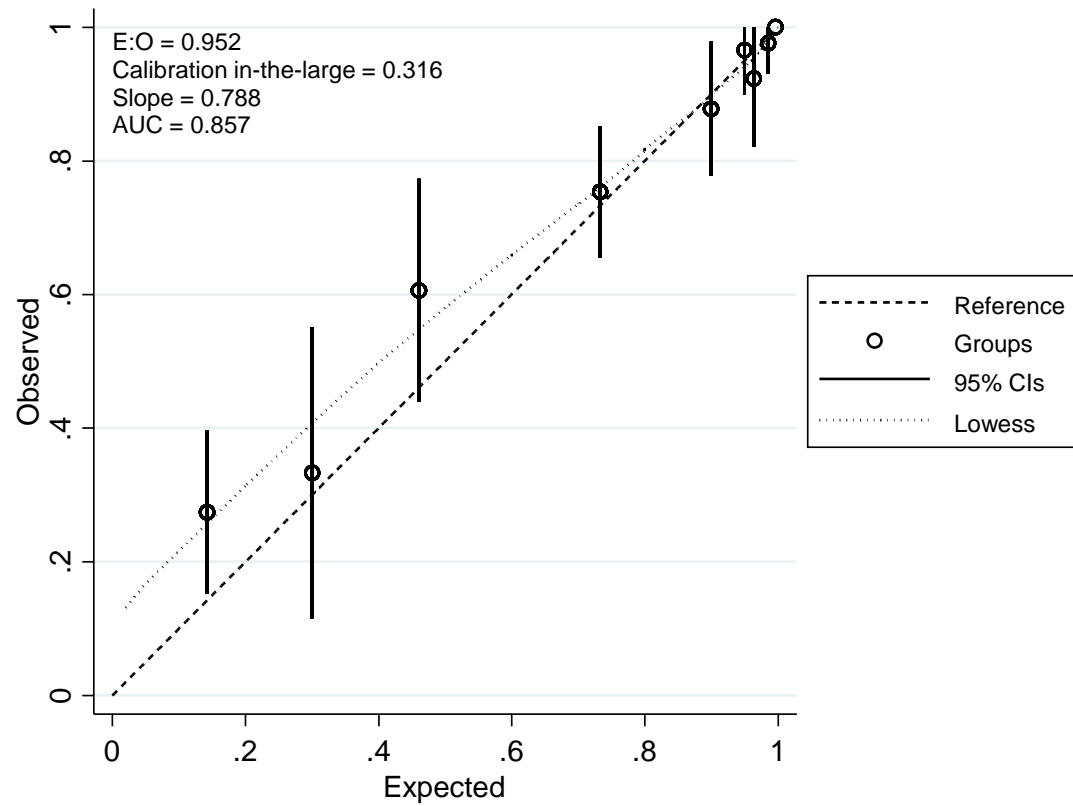

**Supplementary Figure 5.** Calibration plot depicting observed vs. expected numbers of poor neurological outcome at 2 years per decile of risk as predicted by the CAHP score.

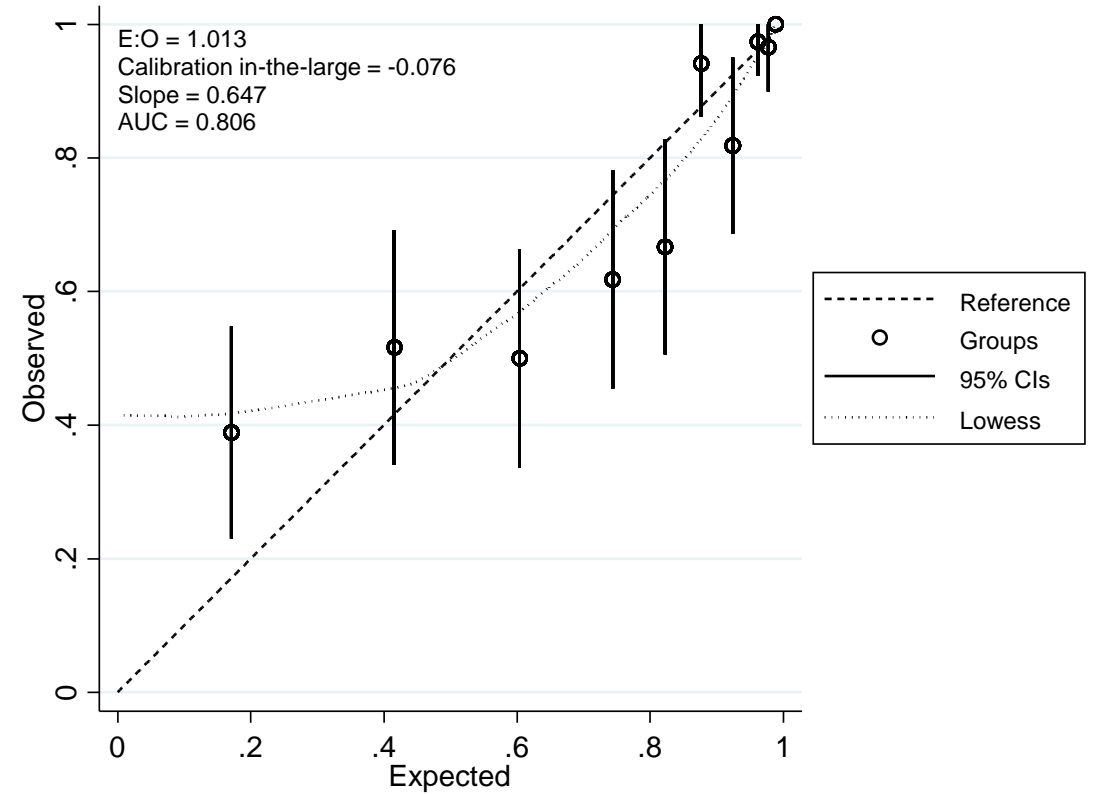

**Supplementary Figure 6.** Calibration plot depicting observed vs. expected numbers of poor neurological outcome at 2 years per decile of risk as predicted by the OHCA score.
